# Supplementary material
Source: publisher figshare collection journal article supplement (https://acs.figshare.com/ndownloader/files/4388791)
Supplement: Supplementary file 1 [file 4388791]

Supporting Information:

Adsorption Characteristics of Monomeric/Gemini Surfactant Mixtures at the Silica/Aqueous Solution Interface (by Sakai et al.)

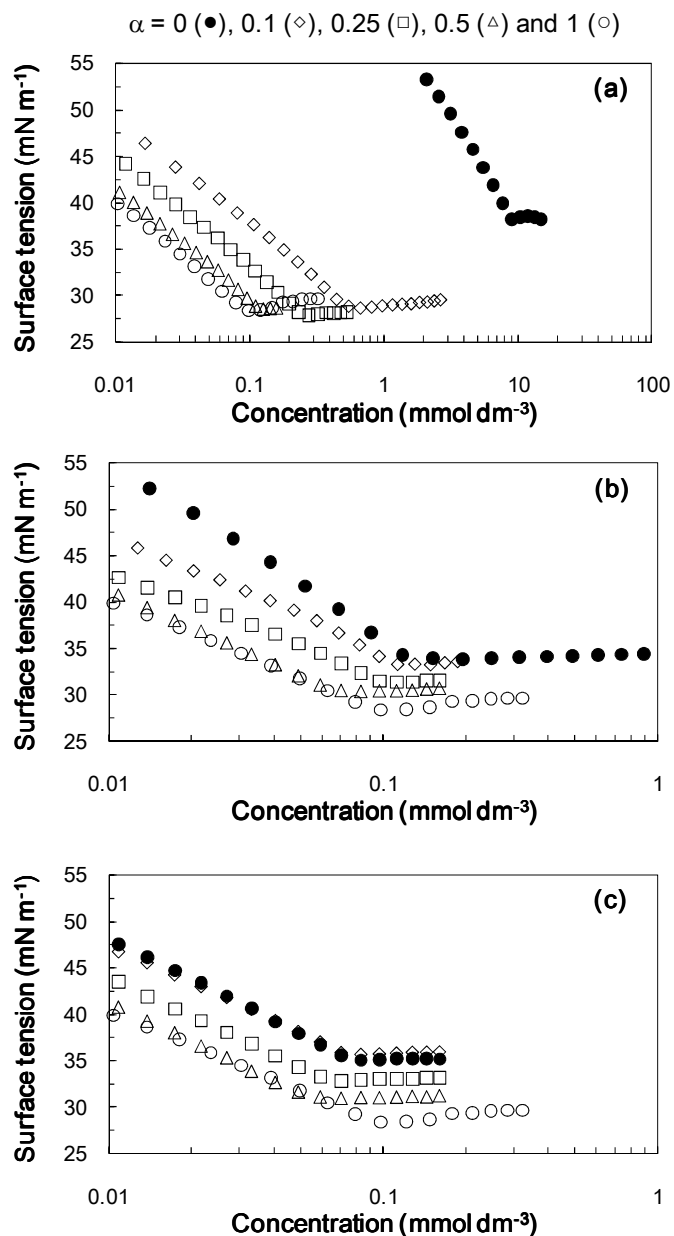

**Figure S1.** Static surface tension data of the three surfactant systems ((a) DTAB/12-2-12, (b) HTAB/12-2-12 and (c) C<sub>12</sub>EO<sub>8</sub>/12-2-12), measured at various mole fractions of 12-2-12 ( $\alpha = 0, 0.1, 0.25, 0.5$  and 1) in the presence of 10 mmol dm<sup>-3</sup> NaBr.

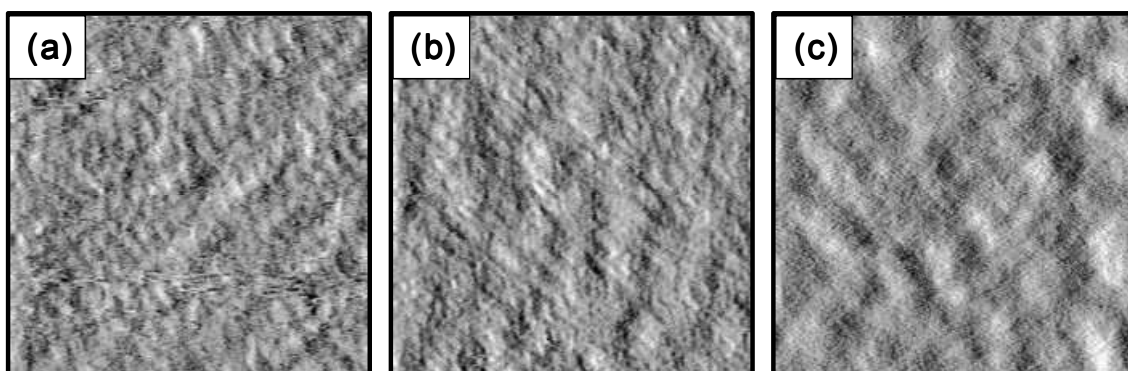

**Figure S2.** 250 nm soft-contact AFM images obtained for the DTAB/12-2-12 mixtures at the mole fractions of 12-2-12 of (a) 0.1, (b) 0.25 and (c) 0.5. The surfactant concentrations were fixed at  $5 \times \text{cmc}$  at each mole fraction in the presence of  $10 \text{ mmol dm}^{-3} \text{ NaBr}$ .

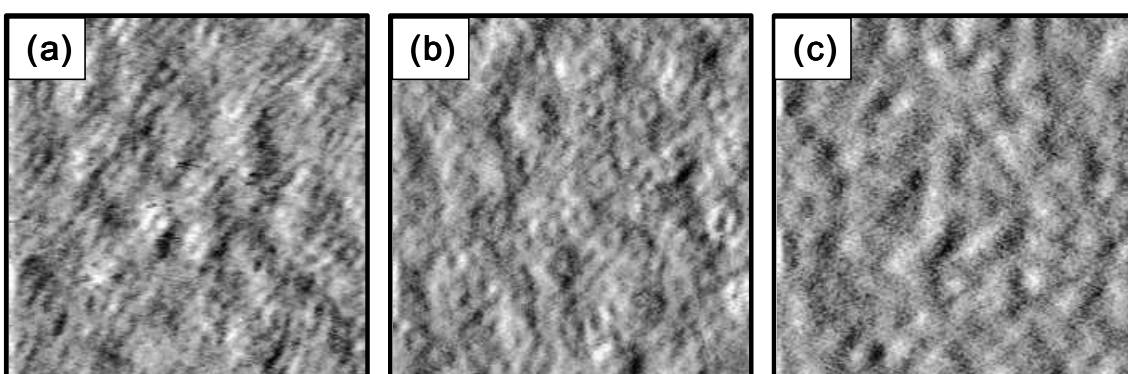

**Figure S3.** 250 nm soft-contact AFM images obtained for the HTAB/12-2-12 mixtures at the mole fractions of 12-2-12 of (a) 0.1, (b) 0.25 and (c) 0.5. The surfactant concentrations were fixed at  $5 \times \text{cmc}$  at each mole fraction in the presence of  $10 \text{ mmol dm}^{-3} \text{ NaBr}$ .

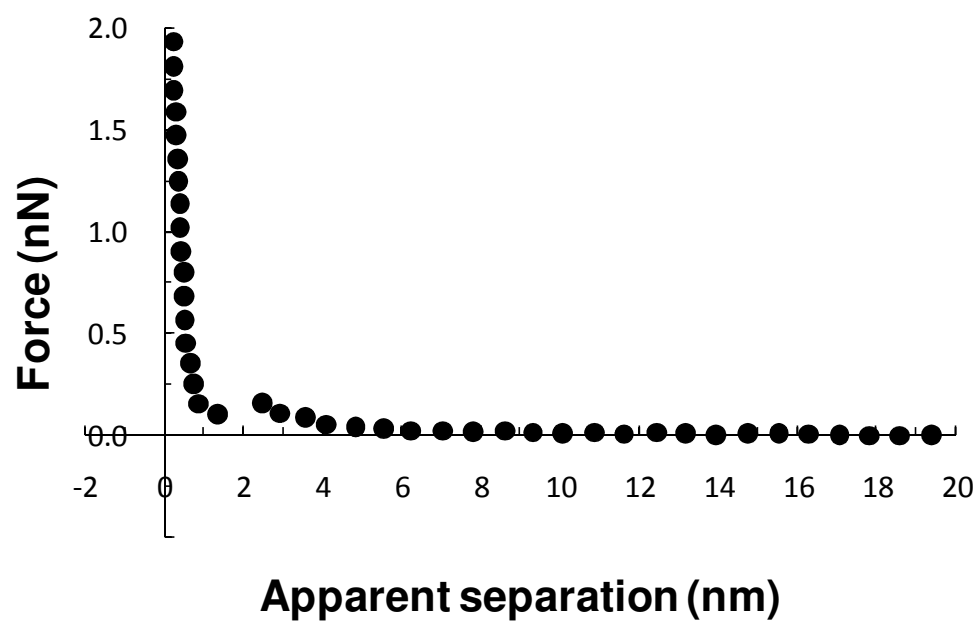

**Figure S4.** Force curve data obtained for the C<sub>12</sub>EO<sub>8</sub> single system. The surfactant concentration was set at  $5 \times \text{cmc}$  in the presence of  $10 \text{ mmol dm}^{-3}$  NaBr. The data shown in this figure are the same as Figure 6c, but the force scale is enlarged.
